# 1 Spatio-temporal dynamics of growth and death within spherical 2 bacterial colonies

3 Anton Welker\*<sup>1</sup>, Marc Hennes\*<sup>1</sup>, Niklas Bender<sup>1</sup>, Tom Cronenberg<sup>1</sup>, Gabriele Schneider<sup>1</sup>,  
4 Berenike Maier<sup>1,2</sup>

5 <sup>1</sup> Institute for Biological Physics, University of Cologne

6 <sup>2</sup> Center for Molecular Medicine Cologne, University of Cologne

7

8 \*equal contribution

9

## 10 Abstract

11 Bacterial growth within colonies and biofilms is heterogeneous. Local reduction of growth rates  
12 has been associated with tolerance against various antibiotics. However, spatial gradients of  
13 growth rates are poorly characterized in three-dimensional bacterial colonies. Here, we report  
14 two spatially resolved methods for measuring growth rates in bacterial colonies. As bacteria  
15 grow and divide, they generate a velocity field that is directly related to the growth rates. We  
16 derive profiles of growth rates from the velocity field and show that they are consistent with  
17 the profiles obtained by single cell counting. Using these methods, we reveal that even small  
18 colonies comprising a few thousand cells of the human pathogen *Neisseria gonorrhoeae*  
19 develop a steep gradient of growth rates within two generations. Furthermore, we show that  
20 stringent response decelerates growth inhibition at the colony centre. Based on our results, we  
21 suggest that aggregation-related growth inhibition can protect gonococci from external stresses  
22 even at early biofilm stages.

23

24

25

26

## 27 Introduction

28 As part of their lifestyle, many if not most bacterial species cluster together and form colonies  
29 and biofilms. At the surface of biofilms, bacteria have maximum access to environmental  
30 nutrients and space for cell growth and division. At the centre of the biofilm, access to nutrients  
31 and space are limited. Therefore, we expect that growth and death dynamics depend on position  
32 and time (1-6). However, to determine growth rates with spatial resolution it is necessary to  
33 track the offspring of a single cell in space and time. This task is technically demanding within  
34 three-dimensional biofilms and there are only few reports that systematically characterize  
35 growth rates of biofilm associated bacteria with spatio-temporal resolution (7). Measuring  
36 generation times in space and time is crucial for understanding the mechanisms of biofilm  
37 development and the development of antibiotic tolerance at the centre of biofilms (8-11).

38 Bacterial growth has been investigated at the colony level by analysing the colony radius  $R$  as  
39 a function of time  $t$  (3, 12, 13). In young colonies, the colony radius grows exponentially as  
40 expected if all cells grow at the same rate. In older colonies, the function  $R(t)$  deviates from  
41 exponential growth and tends to become linear. Simulations indicate that this behaviour is  
42 caused by a gradient of growth rates within the colony. Using reporter strains for distinguishing  
43 between growing and non-growing cells, it was shown that growth was arrested at the centre of  
44 mature biofilms (14-16). However, the corresponding growth rates have not been measured.

45 Lineage tracking allows for the determination of generation times or growth rates with spatial  
46 resolution. Within 2D colonies, individual cell division events are detectable by means of  
47 brightfield or fluorescence microscopy and, therefore, lineages arising from a single cell can be  
48 tracked (17, 18). In 3D colonies, confocal microscopy or light sheet microscopy enable single  
49 cell detection within colonies (19-21). Advanced image analysis techniques have been  
50 developed for characterizing local order, gene expression, and stress responses with spatial and  
51 temporal resolution (22-24). Growth dynamics of *Vibrio cholerae* has been characterized  
52 recently. As a consequence of their rod-like shape, *V. cholerae* shows liquid crystalline order  
53 and this structure gives rise to collective, fountain-like motion of bacteria growing in colonies  
54 (20). To our knowledge, little work has focussed on the measurement of spatio-temporal growth  
55 dynamics within 3D colonies. Given that the size of the bacterial cell body exceeds the limit of  
56 optical resolution only  $\sim (2 - 3)$  fold, lineage tracking is technically difficult. A recent study  
57 reported growth rates in colonies formed by *V. cholerae* (7). Interestingly, the growth rate was  
58 constant throughout the colonies and no spatial gradient was observed.

59 In this study, we investigate collective motion and growth dynamics of spherical bacteria  
60 (cocci) within spherical colonies. We show that growth generates radial motion and  
61 demonstrate that the spatial profile of growth rates can be inferred from the resulting velocity  
62 field. In a complementary approach, we determine the growth rate with spatial resolution by  
63 counting the offspring of bacteria within the colony. Combining both techniques, we  
64 characterize the growth profile within bacterial colonies during biofilm development. At the  
65 edge of the colony, the growth rate remains constant for several hours. Within the colony, a  
66 gradient of growth rates develops and growth ceases close to the colony centre. We show that  
67 inhibition of stringent response accelerates growth inhibition at the colony centre. We conclude  
68 that spatial gradients develop rapidly even in relatively small colonies containing several  
69 thousands of bacteria.

70

### 71 **Colony growth indicates a transition from homogeneous growth to heterogeneous growth.**

72 In the first step, we characterized the growth of 3D *wt\** gonococcal colonies. Colonies were  
73 formed in liquid and subsequently introduced into a flow chamber where growth was monitored  
74 for many hours under constant nutrient flow. The radii  $R$  of the growing colonies were measured  
75 as a function of time. Assuming constant cell density, we derived the number of cells within  
76 the colony relative to the number of cells at the start of the experiment  $t = 0$ ,  
77  $N_{col}(t)/N_{col}(0) = (R(t)/R(0))^3$ . The number of cells increased exponentially during the  
78 initial 2 h (Fig. 1). Using an exponential fit  $N_{col}(t)/N_{col}(0) = \exp(\lambda_{colony}t)$  we found that  
79 the growth rate was  $\lambda_{colony} = (0.56 \pm 0.01)h^{-1}$ . After 2h,  $N_{col}(t)/N_{col}(0)$  deviated from an  
80 exponential behaviour. In the next step, *sfgfp* expressing bacteria (*wt\* green*) will be used for  
81 determining the growth rate at spatial resolution. *sfgfp* was expressed under the strong *pilE*  
82 promoter to ensure detectability of all fluorescent cells. We assessed whether expression and  
83 illumination of the fluorescent marker caused a growth defect by quantifying growth of *wt\**  
84 *green* colonies and found a transition from exponential growth to sub-exponential growth at the  
85 same colony age as for *wt\** colonies (Fig. 1). The growth rate was  $\lambda_{colony}^{green} = (0.42 \pm 0.01)h^{-1}$ .  
86 This difference must be considered in the single cell counting analysis discussed later.

87

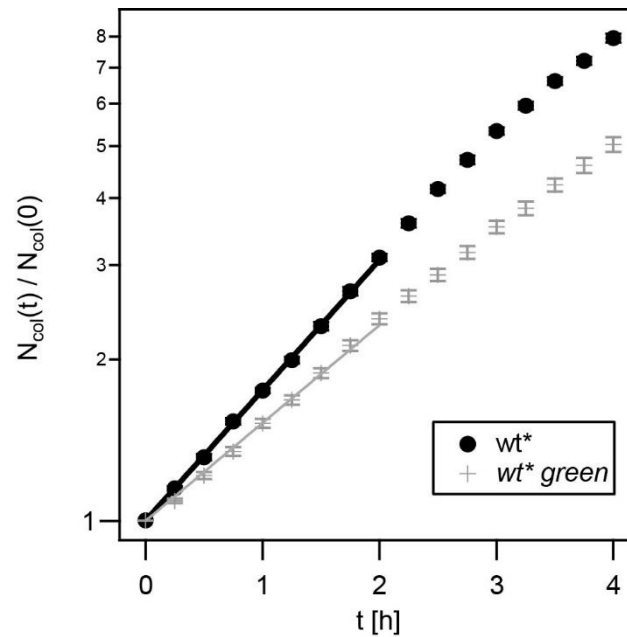

88

89 Fig. 1 Expression of *sfgfp* slightly reduces growth rate. Mean number of cells within colony  $N_{col}(t)$  normalized by  
90 the number of cells in the colony at  $t = 0$ ,  $N_{col}(0)$  for wt\* (Ng150, black) and wt\* green (Ng194, grey). Full lines:  
91 exponential fits with  $N_{col}(t)/N_{col}(0) = \exp(\lambda_{colony}t)$ .  $\lambda_{colony,wt*} = (0.56 \pm 0.01)h^{-1}$  and  $\lambda_{colony,wt*green} =$   
92  $(0.42 \pm 0.01)h^{-1}$ . (mean  $\pm$  se, > 40 colonies for each data point).

93

94 Based on the growth analysis at the colony level, we predict that the profile of growth rates is  
95 homogeneous during the initial 2 h of growth and spatial heterogeneity develops after 2 h.

96

### 97 Lineage tracking within 3D colonies.

98 We developed a lineage tracking method for measuring growth rates of *N. gonorrhoeae*  
99 (gonococcus) within colonies. Recently, the growth rate of rod-shaped cells was measured by  
100 quantifying temporal changes in cell length along the major axis of the rod (7). In cocci, this  
101 method is hampered by the fact that the change in aspect ratio prior to cell division is small and,  
102 additionally, the division plane switches every generation (25). Instead, we track lineages  
103 within colonies. *N. gonorrhoeae* form spherical colonies (24, 26). Tracking of all cells  
104 individually over multiple generations is prohibited by three factors. Firstly, gonococci are very  
105 densely packed (24), and secondly, type 4 pilus mediated interactions between the cells cause  
106 them to move actively (27). As a consequence, high time resolution would be necessary to allow  
107 for single cell tracking and the associated photodamage would prohibit growth rate analysis.  
108 Furthermore, background fluorescence in colonies consisting exclusively of fluorescent cells  
109 would prohibit single cell detection.

110 To avoid these problems, we tracked the offspring of single or few fluorescent cells. A small  
111 fraction of *sfgfp*-expressing cells (*wt green*) was mixed with non-fluorescent *wt\** cells. This  
112 mixture was inoculated into a flow chamber. Medium was continuously flushed through the  
113 chamber, providing constant nutrient and oxygen supply for multiple hours. The medium  
114 contained propidium iodide (PI), a fluorescent dye that stains dead cells. The fluorescence  
115 signals of growing colonies were detected using confocal microscopy (Fig. 2a). Individual  
116 fluorescent cells were identified and their positions within the colonies were determined (Fig.  
117 2b, Movie S1). The circumference of the colony was determined using the brightfield images  
118 (Fig. 2c, Movie S2).

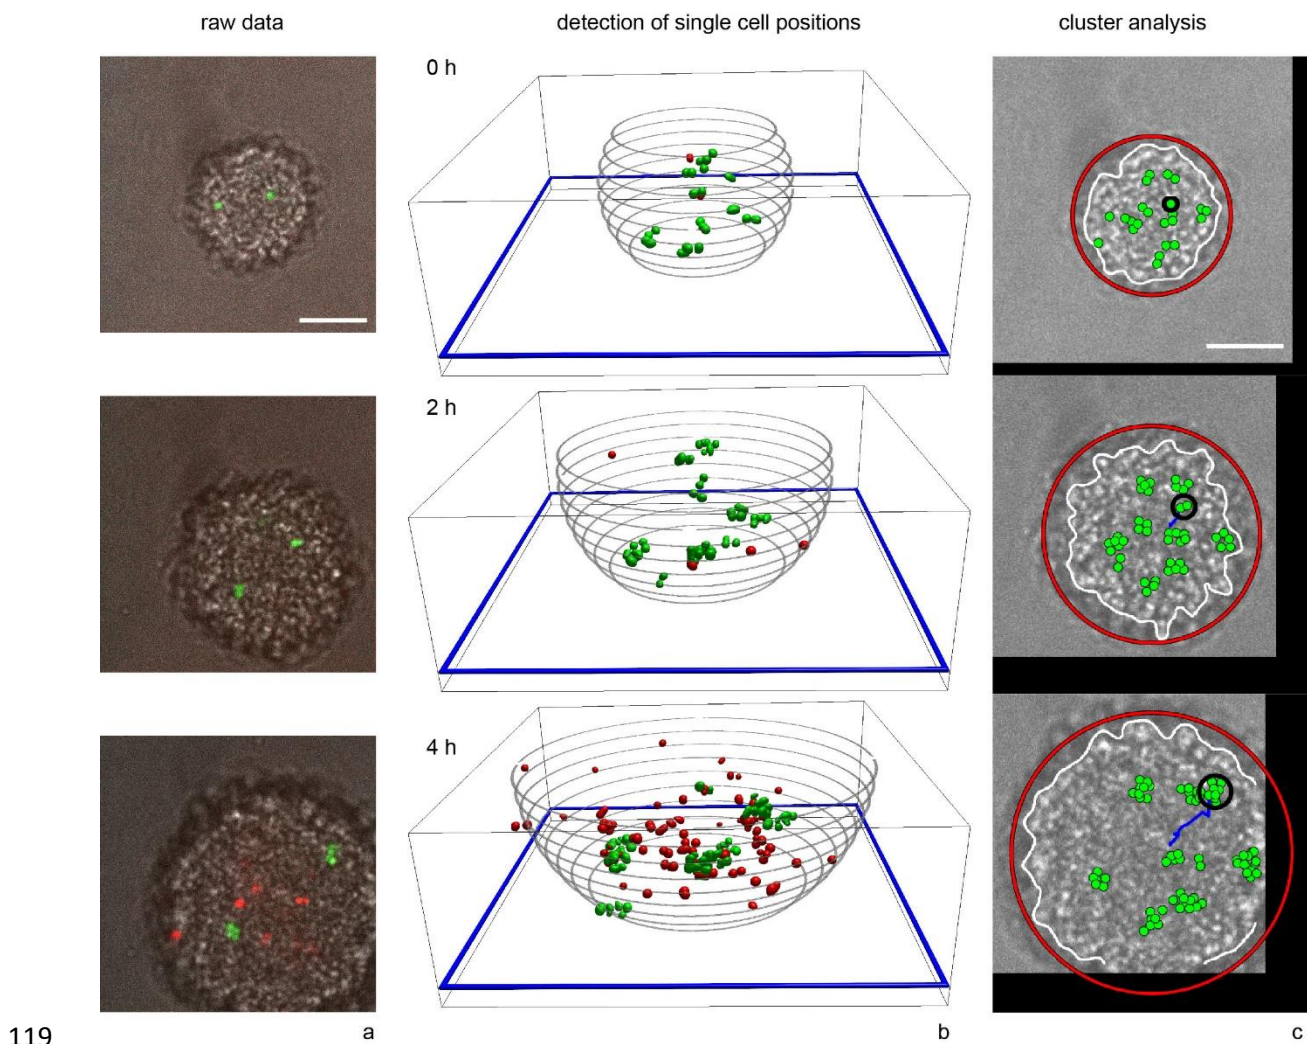

119

120 Fig. 2 Lineage tracking in gonococcal colonies. *wt\** (Ng150) mixed with *wt\* green* (Ng194). a) Typical confocal  
121 plane ( $h = 3 \mu\text{m}$ ) through a colony at different time points. Overlay between brightfield (grey), *sfGFP* fluorescence  
122 (green), and PI fluorescence (red). b) 3D reconstruction of positions of fluorescent cells. The blue frame denotes  
123 the plane shown in a).  $\Delta h$  between grey circles:  $1 \mu\text{m}$ . c) Cluster dynamics in growing colony. Green circles:  
124 Positions of *wt green* gonococci. 3D projections of all *wt green* cells are shown. Black circle: Circumference of  
125 single cluster. Blue line: Trajectory of centre of mass of cluster. White line: Edge of colony. Red circle: Circle  
126 depicting radius of colony. Scale bars:  $10 \mu\text{m}$ .

127

128 A cluster was defined as an assembly of *wt\** *green* cells residing in close proximity (Movie S3).  
129 Given that only few fluorescent (one percent at the beginning of the experiment) cells were  
130 immersed within the colony initially, *wt\** *green* cells can be associated with specific clusters.  
131 The cells within the cluster are the offspring of a single or few cells contained within the cluster  
132 at time  $t = 0$ . In the following two paragraphs, we will describe how the analysis of these  
133 clusters allows us to measure the growth rate with spatial resolution. First, we counted the  
134 number of cells,  $N$ , within the cluster, reflecting the growth rate of *wt\** *green* cells within the  
135 cluster. Second, we analysed the cluster velocity which is influenced by the growth of all cells  
136 (mostly *wt\** cells) residing closer to the colony centre than the cluster and pushing the cluster  
137 towards the edge of the colony.

138

139 **Cell counting (CC) method: Single cell counting reveals that local growth rates decline**  
140 **rapidly at the centre of growing colonies.**

141 The spatially resolved growth rate was measured by counting the number of *wt\** *green* cells  
142 within a cluster,  $N$ , as a function of time. One example of a cluster arising from a single cell is  
143 shown in Fig. 3a, b and Movies S2, S3. In this example, the first three cell division events occur  
144 nearly simultaneously for all cells belonging to the cluster with a generation time of  $\sim 90$  min.

145 We determined the effective local growth rate  $\lambda$  by fitting  $N(t + \tau)/N(t) = \exp(\lambda\tau)$  with  $\tau =$   
146  $(0 - 1.5) h$  as described in the Materials and Methods. The growth rate was  $\lambda \approx 0.45 h^{-1}$  close  
147 to the edge of the colony (Fig. 3c, Fig. S2). This growth rate corresponds to a generation time  
148 of  $T \approx 1.5 h$ . While the growth rate at the edge of the colony remained close to  $\lambda \approx 0.45 h^{-1}$   
149 up to 4.5 h after inoculation, the growth rate decreased as a function of the penetration depth  
150 into the colony. The spatial profile of growth rates was shallow for young colonies. At  $t > 2 h$ ,  
151 growth rates dropped severely and growth ceased near the centres of the colonies. The  
152 development of heterogeneous growth after 2 h is consistent with the transition from  
153 exponential to linear growth of the colony radius at 2 h (Fig. 1).

154 The effective growth rate  $\lambda$  depends on cell duplications and on cell death. Therefore, we  
155 determined the fractions of dead cells  $f_{dead} = N_{dead}/N_{total}$  with spatial and temporal  
156 resolution (Fig. 3d). To this end, we added propidium iodide (PI) to the medium. PI stains cells  
157 with permeable membranes, indicating cell death. Please note that for determination of  $N_{total}$  we  
158 assumed that the density  $\rho$  of cells is constant throughout the colony. Within  $r_e \leq 3 \mu m$  the cell  
159 density is lower compared to the remainder of the colony (Fig. 4c) and, therefore, the fraction

160 of dead cells is overestimated in this regime. Most importantly, the fractions of dead cells were  
 161  $f_{dead} < 5\%$  for all positions and timepoints. Therefore, the influence of cell death on the  
 162 changes in  $N(t)$  is negligible and the effective growth rate  $\lambda$  determined in our experiment is  
 163 very close to the real growth rate and the term "effective" will be discarded in the following. In  
 164 older colonies, the fraction of dead cells at the centres of the colonies increased most strongly.

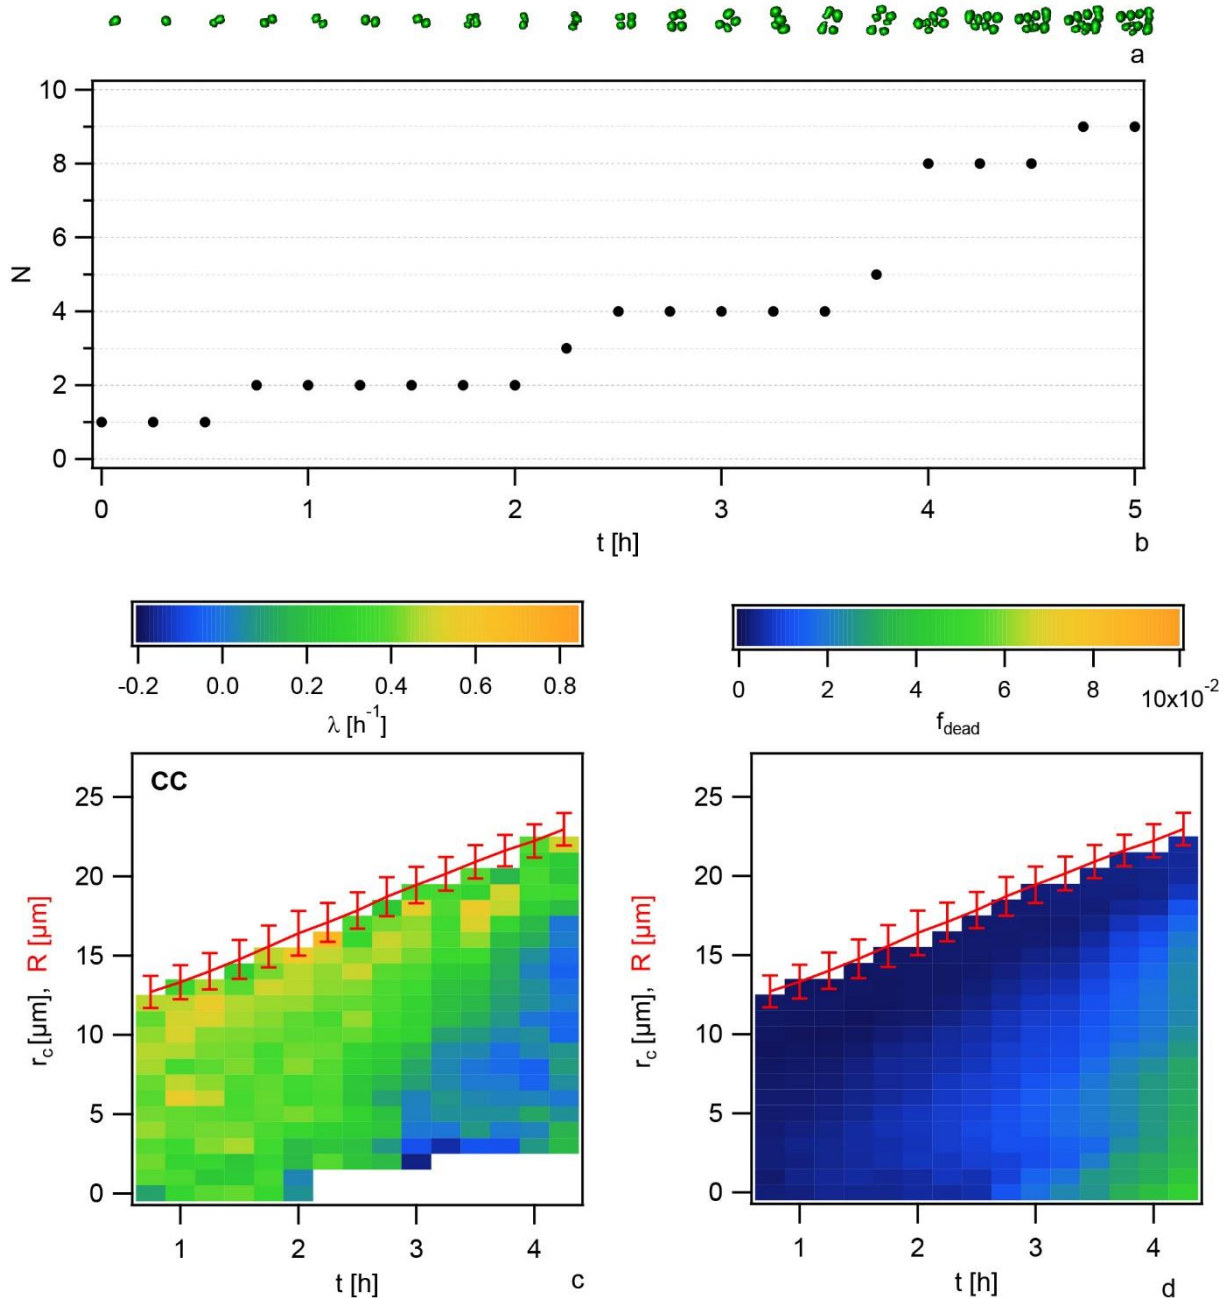

165  
 166 Fig. 3 Spatio-temporal dynamics of growth of *wt\* green* (Ng194) mixed with *wt\** (Ng150). a) Example of single  
 167 growing cluster highlighted in Fig. 2. b) Number of cells  $N(t)$  within the cluster shown in a). c) Growth rate  $\lambda$   
 168 (colour coded) as a function of distance from centre of colony ( $r_c$ ) and time  $t$ . d) Fraction of dead cells  $f_{dead}$  (colour  
 169 coded) as a function of distance from centre of colony ( $r_c$ ) and time  $t$ . Red: Mean colony radius ( $\pm$  standard  
 170 deviation) as a function of time.

171

172 In summary, after a short initial period of exponential growth, complex spatio-temporal growth  
173 profiles developed within gonococcal colonies with severely reduced growth at the colony  
174 centres.

175

176 **Velocity field (VF) method: The generation time can be determined from the radial flow**  
177 **of clusters.**

178 Cell growth and division generate collective cellular movement directed from the centre of the  
179 colony towards its periphery (Fig. 4a). In one- and two-dimensional systems, analysis of this  
180 cellular movement has been employed to infer concentration profiles of nutrients and nutrient  
181 uptake functions bacterial populations (28). Here, we show that the velocity field can be used  
182 for determining the growth rate with spatial resolution in spherical colonies. The velocity of  
183 cluster movement  $\vec{v}(r_c)$  was determined by analysing the trajectories of the centres of mass of  
184 individual clusters (Fig. 4a). Because of the spherical symmetry of the colony, the radial  
185 velocity associated with growth is  $v(r_c) = \vec{v}\vec{e}_r$ , i.e. the velocity vector was projected onto the  
186 unit vector  $\vec{e}_r$  pointing from the colony centre towards its edge, yielding the radial component  
187 of the cluster velocity  $v(r_c)$ .  $v(r_c)$  was close to zero at the centre of the colony at  $r_c \approx 0$  (Fig.  
188 4a, b). With increasing distance from the centre,  $r_c$ , the velocity of clusters increased. At a  
189 colony age of less than 2 h, the speed increased linearly as a function of  $r_c$  with  $v(r_c) =$   
190  $(0.17 \pm 0.01) h^{-1} \cdot r_c$  (Fig. S3). In older colonies, the speed decreased and  $v(r_c)$  became  
191 nonlinear consistent with heterogeneous growth.

192



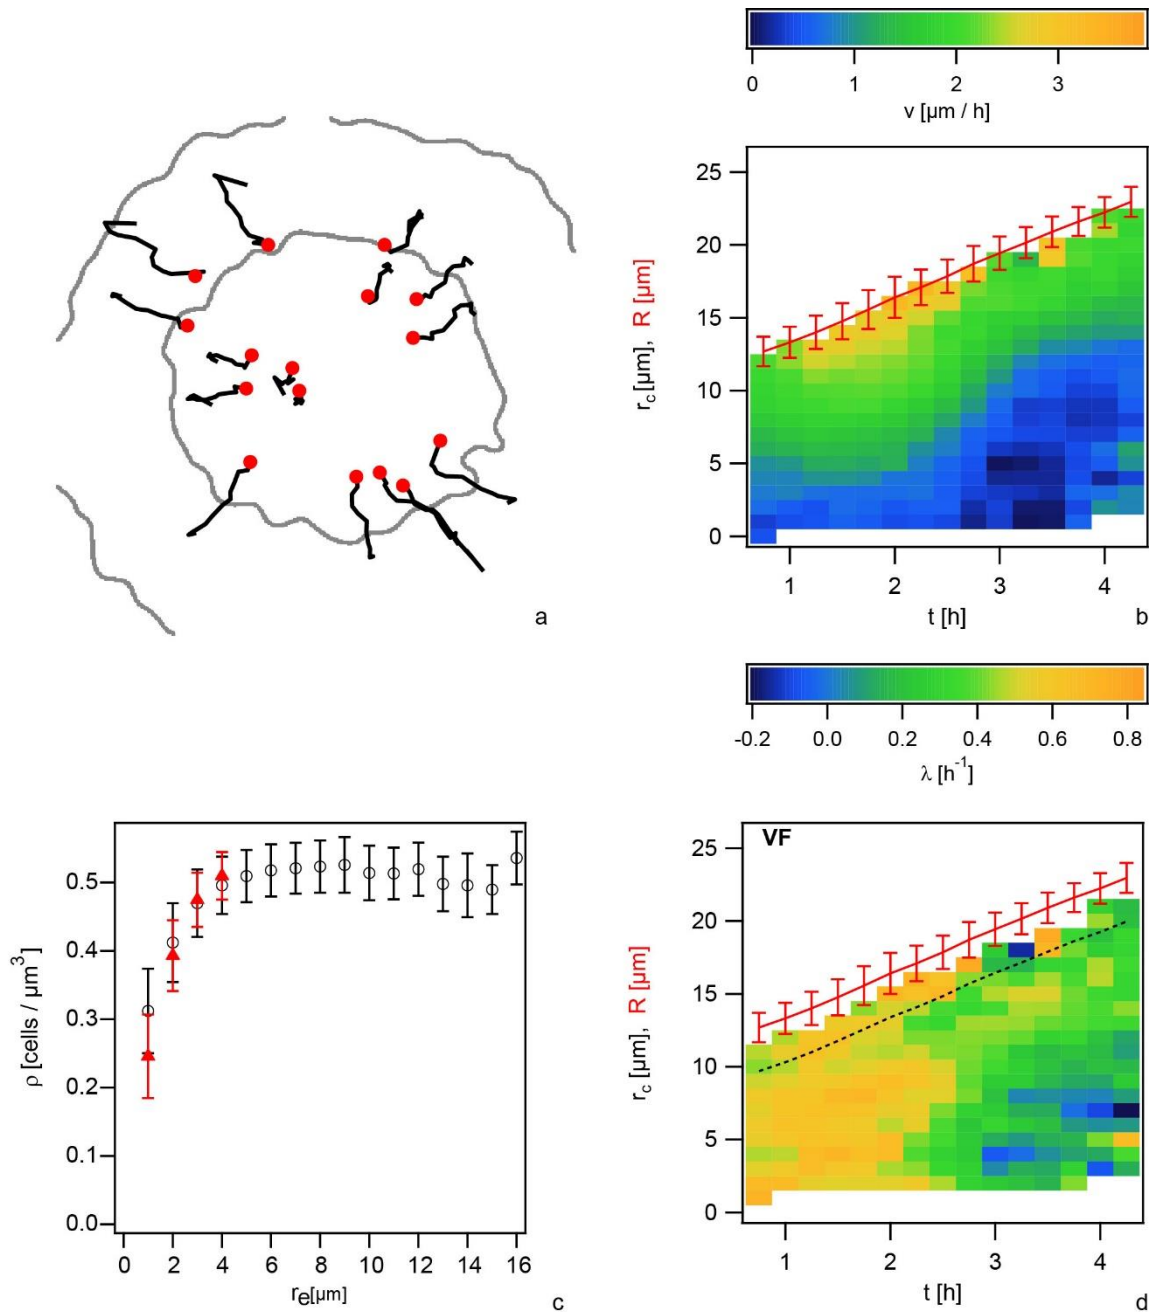

193

194 Fig. 4 Growth rates inferred from velocity field of wt\* green (Ng194) mixed with wt\* (Ng150). a) Trajectories of  
 195 individual clusters moving within one colony acquired over 3 h. Clusters residing at different heights within the  
 196 colony are projected into one plane. Red circles: Start of trajectory, black lines: trajectories, grey lines: outlines of  
 197 colony at 0 h and 3 h, respectively. b) Radial components of cluster velocities  $v$  as a function of distance from  
 198 centre of colony ( $r_c$ ) and time  $t$ . Red: Mean colony radius ( $\pm$  standard deviation) as a function of time. c) Cell  
 199 density  $\rho$  profile through colony. Black circles: cylindrical coordinates, red triangles: spherical coordinates. d)  
 200 Growth rates  $\lambda$  (colour coded) inferred from velocity field as a function of distance from centre of colony ( $r_c$ ) and  
 201 time  $t$ . Red line: Mean colony radius ( $\pm$  standard deviation) as a function of time. Black dotted line: denotes area  
 202 in which reduced cell density introduces a systematic error to  $\lambda$ .

203

204 By analysing the flow field  $v(r_c, t)$ , we can infer the growth rate  $\lambda(r_c, t)$ . To this end, we  
 205 formulate the continuity equation with a growth term  $\lambda\rho$  which breaks mass conservation

206

$$\dot{\rho} = -\vec{\nabla} \cdot (\vec{v}\rho) + \lambda\rho \quad (\text{eq. 1})$$

207 Here,  $\rho(\vec{r}, t)$  is the spatially and temporally varying number density of cells in the colony. We  
208 find that the cell density is constant within the colony, but the density decreases at  $r_e \leq 3 \mu\text{m}$   
209 (Fig. 4c) in agreement with theoretical predictions (29). In the following, we disregard the low-  
210 density area at the colony edge. First, we consider colonies with an age  $t < 2$  h. During this  
211 period of time, the growth rate is nearly constant in space and time. In this regime, eq. 1  
212 simplifies to  $\lambda = 3v_{cluster}/r$ . The linear fit shown in Fig. S3a provides  $\lambda = (0.51 \pm 0.01)h^{-1}$ .  
213 This value is slightly higher than the growth rate determined by the CC method (Fig. 3).

214 Next, we consider older colonies with an age  $t > 2$  h. In these colonies, the growth rate depends  
215 on position. By numerically solving eq. 1 and assuming constant  $\rho$ , i.e.  $\partial_r(r^2v_r) = r^2\lambda$ , we  
216 calculate the growth rate  $\lambda(r_e, t)$  (Fig. 4d). Importantly, we find the same qualitative profiles as  
217 by the cell counting method (Fig. 3c, Fig. S3). At  $t < 2$  h, the growth rates are spatially  
218 homogeneous. In older colonies, the growth rate decreases as a function of distance from the  
219 edge of the colony. The total growth rates in Fig. 4d are slightly but significantly higher  
220 compared to the rates shown in Fig. 3c. The reason for this small quantitative discrepancy can  
221 be explained as follows. The velocity of the cluster formed by  $wt^*$  green cells is determined by  
222 all cells residing at a position  $r_c < r_c^{cluster}$ . Given that only 1 % of the cells within the colony  
223 was fluorescent, the cluster velocity is determined by the growth of  $wt^*$ . By contrast, the cell  
224 counting method used for Fig. 3 relies exclusively on  $wt^*$  green cells which have a lower growth  
225 rate (Fig. 1).

226 In conclusion, bacteria move radially from the centre towards the periphery of the colony as a  
227 consequence of cell growth and the velocity field allows determining the growth rate. This  
228 method confirms that a characteristic growth profile develops after only two generations of  
229 growth within the colony.

230

231 **Nutrient supply is nearly saturating.** Unexpectedly, the growth rate decreased even within  
232 small colonies continuously supplied with rich medium. We hypothesized that either a  
233 metabolite or oxygen were depleted at the centres of the colonies. To assess this hypothesis, we  
234 increased the flow rate of the medium 5 fold. Indeed, the growth rate increased slightly (Fig.  
235 S4, S5). However, the colony radius grew exponentially only for 2 h, indicating that growth  
236 became heterogeneous. Reminiscent of the experiments run under standard flow rates, after 2  
237 h of growth, the growth rate decreased strongly as a function of penetration depth (Fig. S4).  
238 This behaviour was observed consistently with the cell counting (CC) method and with the

239 velocity field (VF) method. We conclude, therefore, that limitation of nutrients or oxygen is not  
240 the main cause for the growth inhibition in gonococcal colonies.

241

### 242 **Lack of stringent response influences the spatio-temporal growth dynamics.**

243 Limitation of nutrients at the centre of colonies is one potential explanation for decreased  
244 growth rate. The stringent response is involved in adaptation to nutrient limitation including  
245 amino acid, carbon, and fatty acid starvation (30, 31). RelA and SpoT adjust the level of  
246 (p)ppGpp, whose accumulation triggers stringent response (32). Deletion of *relA* suppresses  
247 (p)ppGpp production in gonococci and deletion of *spoT* unmakes the growth defect caused by  
248 *relA* deletion alone (33). We addressed the question whether stringent response affected growth  
249 and death in our system. To this end, we mixed  $\Delta relA \Delta spoT$  green cells with  $\Delta relA \Delta spoT$  cells  
250 and characterized the spatio-temporal dynamics of growth and death in these mixed colonies  
251 (Fig. 5).

252 We found that at early time points the growth rates of the  $\Delta relA \Delta spoT$  colonies were higher  
253 compared to the rates in *wt\** colonies (Fig. 5, Fig. S5, S6). However, the growth rates dropped  
254 even in young colonies after  $t > 1$  h at the colony centre (Fig. 5, Fig. S5, S6). This behaviour  
255 was found both by the CC method (Fig. 5a), by the VF method (Fig. 5b, c), and by analysing  
256 the total number of cells within colonies (Fig. S6). The fraction of dead cells close to the colony  
257 centre was higher by a factor of  $\sim 2$  in the  $\Delta relA \Delta spoT$  compared to the fractions in *wt\** colonies  
258 (Fig. 5d).

259

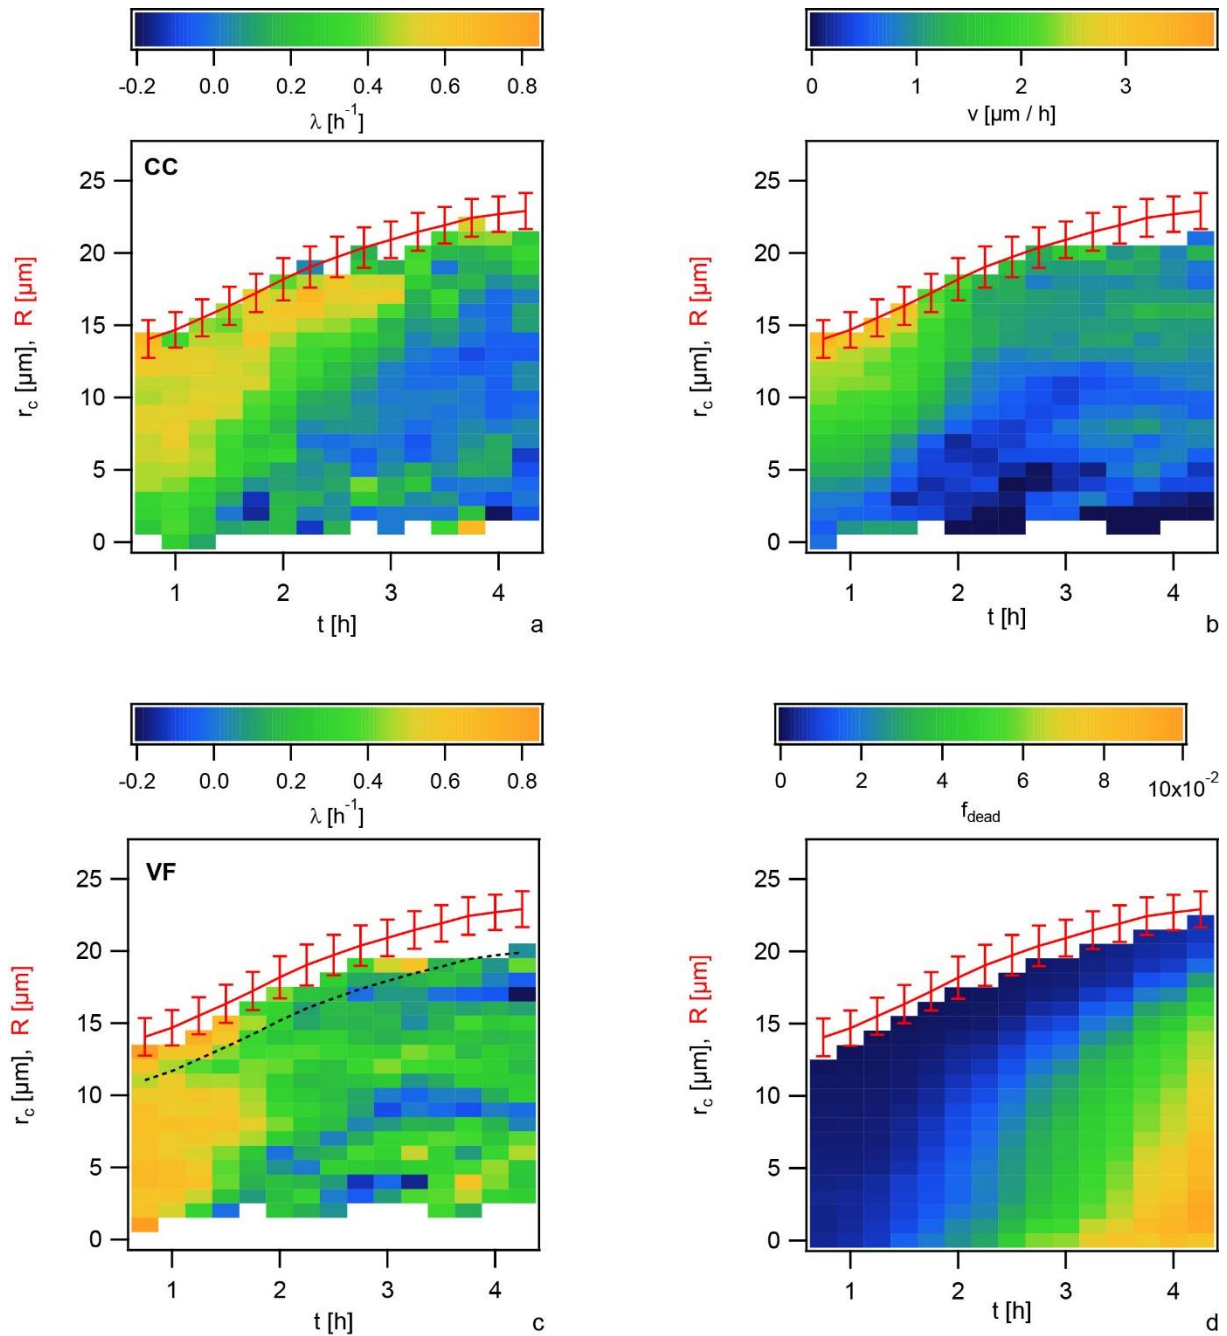

260

261 Fig. 5 Stringent response affects growth and death dynamics. *ΔrelA ΔspoT green* (Ng224) were mixed with *ΔrelA*  
 262 *ΔspoT* (Ng198). a) Growth rate  $\lambda$  (colour coded) as a function of distance from centre of colony ( $r_c$ ) and time  $t$ .  
 263 (CC method) b) Radial components of cluster velocities  $v$  as a function of of distance from centre of colony ( $r_c$ )  
 264 and time  $t$ . c) Growth rates  $\lambda$  (colour coded) as a function of distance from centre of colony ( $r_c$ ) and time  $t$ . Black  
 265 dotted line: denotes area in which reduced cell density introduces a systematic error to  $\lambda$ . (VF method) d) Fraction  
 266 of dead cells  $f_{dead}$  (colour coded) as a function of distance from centre of colony ( $r_c$ ) and time  $t$ . Red lines: Mean  
 267 colony radius ( $\pm$  standard deviation) as a function of time.

268

269 Taken together we found that inhibition of stringent response affects growth and death within  
 270 the colony. Specifically, growth arrest in stringent response deficient colonies occurs  
 271 prematurely.

272

## 273 **Discussion**

### 274 **Potentials and limitations of different methods for determining growth rates.**

275 Measuring growth rates is tricky and prone to various errors. The classic method for  
276 determining growth rates, i.e. the determination of optical density (OD600) as a function of  
277 time during bacterial growth, yields the growth rate, aka. Malthusian parameter. While this  
278 method is well-accepted, it is prone to various errors often ignored in the literature. For  
279 example, adhesion between bacteria and between bacteria and surface reduces the OD600  
280 mimicking reduced growth rates (34). Furthermore, the OD600 can be susceptible to changes  
281 in gene expression or changes in cell size affecting the optical properties of the bacteria. One  
282 of the most accurate methods for determining relative changes in growth rates through  
283 mutations is the competition assay (35, 36). But even this method is error-prone; for example,  
284 cellular interactions like toxin secretion can falsify the growth rates determined by this method.

285 The methods introduced here, are based on single cell visualization and, therefore, circumvent  
286 the problems described above. We developed two different methods allowing to determine  
287 growth rates at spatial resolution. As discussed in the following, both methods implicate  
288 complementary advantages and disadvantages. We propose combining both methods to  
289 robustly characterize the growth profile within bacterial colonies. First, by counting the number  
290 of off-spring of one or few fluorescent cells over short periods of time, the growth rates were  
291 determined (CC method). Most importantly, this method allows characterising rates with spatial  
292 and temporal resolution. It relies on detection of single cells within a large 3D structure and,  
293 therefore, sufficiently strong fluorescence signal of individual cells is essential. To achieve a  
294 high signal-to noise ratio, *sfgfp* was expressed under the control of the strong *pilE* promoter  
295 causing a reduction of growth rate (Fig. 1). Second, we inferred the growth rates from the  
296 velocity field caused by cell growth (VF method). This method does not suffer from effects  
297 related to *sfgfp* expression or cell damage by laser light because the fraction of *wt\** *green* cells  
298 was only 1 % and the velocity field is dominated by *wt\** cells. However, the method is  
299 susceptible to changes in cell density. Under the conditions studied, cell density was constant  
300 within the bulk of the colony, but decreased considerably at the edge of the colony. Therefore,  
301 the growth rate could not be determined in this region with the second method. Some external  
302 stresses cause swelling of cells (21). Swelling would cause the colony to expand and would  
303 introduce errors to the determination of growth rates. While both methods have complementary  
304 problems, they yield comparable growth profiles. Quantitatively, the VF-method tends to

305 provide slightly higher growth rates consistent with the values determined for the total numbers  
306 of cells within a colony derived from the colony radii.

307 Growth of gonococci was considerably more efficient on agar plates. In earlier work, we  
308 characterized gonococcal growth in fluorescent colonies on agar plates by quantifying the  
309 fluorescence intensity as a function of time (37, 38). Exponential colony growth proceeded for  
310 many hours and the growth rates were considerably higher. In the agar plate assay, bacteria  
311 grew into flat colonies for many generations and this geometric difference together with  
312 different concentrations of O<sub>2</sub> and CO<sub>2</sub> can explain the discrepancy.

313

314 **Within few generations, growth rates become spatially heterogeneous and stringent**  
315 **response retards development of heterogeneity.**

316 Rather unexpectedly we found that a characteristic growth profile develops within small  
317 gonococcal colonies after no more than two generations under continuous supply of medium  
318 optimized for gonococcal growth. The growth rate is constant as a function of time within a 3  
319  $\mu\text{m}$  ring at the periphery of the colony. Remarkably, this is the low-density area. Within the  
320 colony, the growth rate decreases continuously as a function of penetration depth and growth  
321 stops at a depth of  $\sim 10 \mu\text{m}$  corresponding to  $\sim 10$  bacteria. Interestingly, this gradient develops  
322 even faster when stringent response is inhibited. This result suggests that stringent response  
323 drives the cells to reallocate their resources more efficiently to maintain growth within colonies  
324 and we conclude that stringent response plays a role in adaptation to life in colonies as shown  
325 for biofilms formed by other species (9).

326 What inhibits growth at the centre of gonococcal colonies? Depletion of nutrients or O<sub>2</sub> might  
327 be responsible for growth inhibition. Cells residing at the colony edge are likely to deplete  
328 nutrients, generating a gradient of nutrient / O<sub>2</sub> concentration (28). By increasing the flow rate,  
329 nutrient concentrations close to the centres of the colonies would increase. Therefore, we would  
330 expect a delay of the onset of growth inhibition. However, we showed that increasing the flow  
331 rate did not shift the onset of growth arrest at the centre of the colony considerably. Therefore,  
332 we think that mechanical constraints are likely to limit growth within the colony (39-41).  
333 Gonococci are tightly packed within colonies with an estimated volume fraction of  $\Phi \approx 0.5$   
334 and mechanical stress building up as cells grow, might inhibit cellular proliferation (6). We  
335 have shown that freshly assembled colonies rearrange with a relaxation time of  $\sim 1 \text{ min}$  (24),  
336 suggesting that mechanical constraints should not limit proliferation in young colonies. Future

337 studies need to address mechanical properties of older colonies and effects of nutrient limitation  
338 on the growth profile.

339 To our knowledge, growth rates have been determined with spatial resolution only for *V.*  
340 *cholerae* colonies so far (7). There, growth rates were constant even at a penetration depth of  
341 30  $\mu\text{m}$ . Different bacterial densities and cell shapes may explain the different growth profiles.  
342 The volume fraction  $\Phi$  of *V. cholerae* of  $\Phi \approx 0.2$  (42) was considerably lower compared to *N.*  
343 *gonorrhoeae*. Moreover, for rod-shaped *V. cholerae* orient vertically and move collectively as  
344 the colony grows and expands (20). For spherical gonococci, however, we find a radial flow at  
345 early times whose speed declines as the colony ages.

346

## 347 **Conclusion**

348 The rapid growth arrest at the centres of the gonococcal colonies suggests that aggregation can  
349 rapidly cause tolerance against antibiotics acting on growing bacteria. This is consistent with  
350 previous reports showing that gonococcal aggregation enhances their survivability under  
351 ceftriaxone treatment with the fraction of dead cells being highest at the colony edge (21, 43).  
352 Our methods are applicable to all spherical colonies and it will be interesting to compare the  
353 growth profiles between different species.

354

355

## 356 **Materials and Methods**

357 **Growth conditions.** Gonococcal (GC) base agar was made from 10 g/l dehydrated agar (BD  
358 Biosciences, Bedford, MA), 5 g/l NaCl (Roth, Darmstadt, Germany), 4 g/l  $\text{K}_2\text{HPO}_4$  (Roth), 1  
359 g/l  $\text{KH}_2\text{PO}_4$  (Roth), 15 g/l Proteose Peptone No. 3 (BD Biosciences), 0.5 g/l soluble starch  
360 (Sigma-Aldrich, St. Louis, MO), and supplemented with 1% IsoVitaleX (IVX): 1 g/l D-glucose  
361 (Roth), 0.1 g/l L-glutamine (Roth), 0.289 g/l L-cysteine-HCL x  $\text{H}_2\text{O}$  (Roth), 1 mg/l thiamine  
362 pyrophosphate (Sigma-Aldrich), 0.2 mg/l  $\text{Fe}(\text{NO}_3)_3$  (Sigma-Aldrich), 0.03 mg/l thiamine HCl  
363 (Roth), 0.13 mg/l 4-aminobenzoic acid (Sigma-Aldrich), 2.5 mg/l  $\beta$ -nicotinamide adenine  
364 dinucleotide (Roth), and 0.1 mg/l vitamin B12 (Sigma-Aldrich). GC medium is identical to the  
365 base agar composition but lacks agar and starch.

366

367 **Bacterial strains.** All strains used in this study (Table S1) are based on *N. gonorrhoeae* strain  
368 Ng150 (4), here called *wt\**. In this strain, we deleted the G4 motif responsible for pilin antigenic

369 variation. If this motif were present, the primary structure of the major pilin PilE would vary  
370 and this variation may affect T4P-T4P interactions and colony dynamics (44).

371 For construction of *wt\* green*, the *pilE* promoter region ( $P_{pilE}$ ) was amplified from genomic  
372 DNA of strain NG150 ( $\Delta G4$ ) using primers TC22 (5'-  
373 AGTTCTTCACCTTTGCTAACCATAAAAATTACTCCTAATT GAAAGGGGAAATG-3')  
374 and NB065 (5'-TTTTAATTAATTCCGACCCAA TCAACACACCC-3'). The *sfgfp* gene  
375 sequence was amplified from plasmid pET28a-*sfgfp* (Addgene, Plasmid #85492) with primers  
376 TC21 (5'-CATTTCCCCTTTCAATTAGGAG  
377 TAATTTTATGGTTAGCAAAGGTGAAGAACT-3') and NB066 (5'-  
378 TTGGCCGGCCTTATTATACAGTTCATCCATACCGTG-3'). Both fragments were  
379 subsequently merged in a fusion-PCR: fragments were mixed in a 1:1 ratio and a PCR was  
380 performed for 20 cycles without the addition of primers. Afterwards, primers NB065 and  
381 NB066 were added to the reaction and the PCR was continued for another 20 cycles. The  
382 obtained fusion product *PpilE-sfgfp* was subsequently subcloned into the vector pLAS (38) via  
383 FseI and PacI (New England Biolabs) digest. The generated plasmid pLAS-*sfgfp* was  
384 transformed into *E. coli* DH5 $\alpha$  and transformants were selected on LB-agar plates containing  
385 kanamycin. The correct sequence of the vector insert was verified by sequencing with primers  
386 TC19 (5'- CCTTAATTAAGGTTATTATACAGTTCATCCATACCGTG-3') and TC20 (5'-  
387 TCTGGCCGGCCTTCCGACCCAATCAACACACC-3'). Finally, the plasmid was  
388 transformed into strain NG150 ( $\Delta G4$ ) to insert the *PpilE-sfgfp* gene between the *lctP* and *aspC*  
389 loci. Transformants were selected on GC-agar plates containing spectinomycin. Expression of  
390 *sfgfp* was confirmed via fluorescence microscopy.

391 Strain  $\Delta relA \Delta spoT$  (Ng198) was constructed as follows. Regions upstream and downstream of  
392 *relA* gene were amplified from isolated genomic DNA of strain  $\Delta G4$  (Ng150). PCRs were  
393 performed using primers GS\_043 (5'-TATGCTGACCGGGGTTTTGG-3') and GS\_044 (3'-  
394 TTAAACCAGTTCCT CTCATCATTTACGGTGCATAGGCGGG-5') for amplification of  
395 *relA*-5'UTR, whereas GS\_047 (5'- TGTCTCATTCGCTTCCGTA  
396 GGATAACGCTTCAGACGGCA-3') and GS\_048 (3'- GCG GTCGTTAA AACTCCCGAA-  
397 5') were applied for *relA*-3'UTR. *kanR* was amplified from Kanamycin resistant strain Ng050  
398 using primers GS\_045 (5'- GAT  
399 GAGAGGAACTGGTTTAAATATCGTCGCAAGATGCGGT-3') and GS\_046 (3'-  
400 TACGGAAG CGGAATGAGACA GTCCCGTCAAGTCAGCGTAA-5'). The resulting three  
401 single fragments were linked by Fusion-PCR and transformed into strain Ng150. Transformants  
402 (Ng197) were selected on GC-agar plates containing kanamycin. Deletion of *relA* was



403 confirmed by sequencing with primers GS\_043 (5'- TAT GCTGACCGGGGTTTTGG-3'),  
404 GS\_045 (5'-GATGAGAGGAAGTGGTTTAAATATCG TCGCAAGATG CGGT-3') and  
405 GS\_046 (3'- TACGGAAGCGGAATGAGACAGTCCCGTCAAGTCAGC GTAA-5')

406 Deletion of *spoT* was achieved by amplifying *spoT*-5'UTR from gDNA of  $\Delta$ G4 strain (Ng150)  
407 with primers GS\_037 (5'- TCGCCGGCAAGTATGAATAC-3') and GS\_038 (3'-  
408 TAATAAGTAAAG CAGGTAAAACGGGTTGC-5'). For amplification of *spoT*-3'UTR  
409 primers GS\_041 (5'-CACGAGCT CCTTCAGACGGCTTTCGGGATG-3') and GS\_042 (3'-  
410 GGTTGGAAAATATACAGGTAAAAAATATG TCC-5') were used. Isolated plasmid DNA  
411 of *ermR-pIGA* served as template for amplification of *ermC* with primers GS\_039 (5'-  
412 TTTACCTGCTTTACTTATTAATAATTTATAGCTATTGAAAAG-3') and GS\_040 (3'-  
413 GCCGTCTGAAGGAGCTCGTGCTATAATTATAC-5'). PCR-products were merged by  
414 Fusion-PCR, transformed strain Ng197 and selected on GC-plates containing erythromycin,  
415 resulting in strain  $\Delta$ *relA*  $\Delta$ *spoT* (Ng198). Replacement of *spoT* by *ermC* was verified via  
416 sequencing using primers GS\_037 (5'- TGC GCCGGCAAGTATGAATAC-3'), GS\_049 (5'-  
417 ATTGCCGAACCCGCCGTTCT-3'), GS\_050 (5'- GCA AACCCGTATTCCACGAT-3') and  
418 GS\_51 (5'- CGGTTCGGTTTGTATTGCGG-3').

419 *sfgfp* is expressed under the control of the *pilE* promoter with has high expression levels. We  
420 investigated whether *sfgfp* expression affects the growth rate of gonococci in our assay by  
421 comparing the number of cells per colonies  $N_{col}(t)$  as a function of time (Fig. 1). We found that  
422 the growth rate of *wt\** *green* cells expressing *sfgfp* is 14 % lower compared to *wt\** cells that do  
423 not express fluorescent proteins. Therefore, the growth rate determined by counting the number  
424 of *wt\** *green* cells per cluster,  $N(t)$ , is expected to be lower compared to the growth rate  
425 determined from colony growth during the exponential phase in agreement with Fig. 3a.

426  
427 **Confocal microscopy.** *wt\** and *wt\** *green* cells were grown for 14 h on GC + IsoVitaleX plates  
428 at 37°C, 5% CO<sub>2</sub> and re-suspended in 5 mL GC + IVX medium at an OD 0.1. The ratio of non-  
429 fluorescent *wt\** and fluorescent *wt\** *green* cells was set to 100:1. Supplementation of 100  $\mu$ L  
430 miliQ water dissolves existing bacterial colonies and shaking at 37°C, 5% CO<sub>2</sub> for 30 minutes  
431 allows for colony reassembly. From this suspension, 250  $\mu$ L are injected into a microfluidic  
432 flow chamber (Ibidi Luer 0.8 mm channel height + Ibitreat) connected to a peristaltic pump  
433 (model 205U; Watson Marlow, Falmouth, United Kingdom) for constant nutrient supply of 1  
434 rpm (standard flow rate) or 5 rpm (five-fold flow rate) (GC + IVX + 0.004%PI). Prior usage,  
435 all flow chambers were coated with Poly-L-Lysine (Sigma, Cat. No. P4832, 50  $\mu$ g/ml).

436 Images were acquired using an inverted microscope (Ti-E, Nikon) equipped with a spinning  
437 disc confocal unit (CSU-X1, Yokogawa) and a 100x, 1.49 NA, oil immersion objective lens.  
438 The excitation wave lengths were 488 and 561 nm. The sfGFP signal of the cells and a bright-  
439 field image were recorded for 5 h every 15 min. Starting from the surface of the glass coverslide,  
440  $40\ \mu\text{m} \times 40\ \mu\text{m} \times 25\ \mu\text{m}$  large image stacks with a voxel size of  $0.08\ \mu\text{m} \times 0.08\ \mu\text{m} \times 0.4\ \mu\text{m}$   
441 were acquired.

442

443 **Detection of single cell positions and cluster analysis.** Bright-field images were used to  
444 determine the colonies' centers of mass and radius. For this purpose, a circle was fitted to the  
445 colony contour, which is determined by a threshold applied on the filtered bright-field images.  
446 The height of the center of mass of the colony was estimated with  $0.85 \times$  colony radius.

447 From the confocal image stacks, single cell positions of *wt\* green* cells were determined. All  
448 confocal images were registered using the center of mass of the colony and stretched by a factor  
449 of 3 in z-direction to obtain spherical intensity profiles of all particles. Every image voxel was  
450 taken to the power of 3 to increase the image contrast. The mean intensity profile of several  
451 different monococci inside bacterial colonies were used to generate a symmetrical 3D kernel  
452 for convolution of all images. Spheroidal features were found using the MATLAB feature3d  
453 function written by Yongxiang Gao and Maria Kilfoil (45) based on IDL code written by John  
454 C. Crocker and David G. Grier (46). Clusters are defined by spheroidal features, which are less  
455 than  $2\ \mu\text{m}$  apart from each other. Because the number of clusters is much smaller compared to  
456 the number of features, clusters can be tracked by the MATLAB trackmem function written by  
457 Maria Kilfoil, again based on IDL code written by John C. Crocker. We applied the tracking  
458 algorithm to cluster positions located in time intervals  $[t, t + 1.5h]$  with  $t \in [0h: 0.25h: 3h]$ .  
459 Only trajectories with a length of 1.5 h were used for further analysis.

460 We derived the mean growth rate as a function of the distance  $r_e$  from the edge of the colony  
461 by fitting  $\langle N^*(r_e, t + \tau) \rangle = \exp(\lambda\tau)$ , where  $N^*$  is the normalized and averaged data of  
462 individual clusters within position intervals  $[r_e, r_e + 2\ \mu\text{m}]$  within 1.5 h time intervals. The  
463 mean distance to the colony edge was defined for each cluster by averaging every distance to  
464 the colony edge within the 1.5 h time intervals. The velocity of each cluster depends on the  
465 distance to the centre of mass of the colony. Hence, we sorted the data relative to the colony  
466 centre of mass in the intervals  $[r_c, r_c + 2\ \mu\text{m}]$ . In general, we did not select for a specific colony  
467 size. However, it was necessary for the heatmaps illustrations. Hence, we determined the mean  
468 colony radius  $R$  and its standard deviation at every timepoint. Colonies, which were larger or

469 smaller than a standard deviation from the mean colony radius were discarded. Growth rates  
470 were plotted relative to the mean colony radius and velocities were plotted relative to the centre  
471 of mass of the colonies.

472 To assess the robustness of our algorithm with respect to the order of data averaging and  
473 exponential fitting, we fitted the  $N(t)$  data of individual clusters as follows. To obtain Fig. S1,  
474 we derived growth rates of single clusters by fitting an exponential function  $\frac{N(t+\tau)}{N_0(t)} = \exp(\lambda\tau)$   
475 to the number of cells,  $N$ , inside a cluster within the time interval indicated. The medians of the  
476 distributions in Fig. S1 agree well with the data shown in Fig. 3c. We note, however, that there  
477 are pronounced peaks at  $l_{single} = 0$ , indicating that some clusters do not start replicating.

478

479 **Determination of growth rate from velocity fields.** The growth rate  $\lambda$  was calculated by  $\lambda =$   
480  $div(v) = 2 * \frac{v}{r_c} + \frac{dv}{dr_c}$  using spherical coordinates. Given the velocities shown in the heat maps,  
481 the previous equation simplifies to  $\lambda(r) = 2 * \frac{v(r)}{r_c(r)} + \frac{v(r-1)-v(r+1)}{2 \mu m}$ . Thus, the growth rates were  
482 directly calculated from the velocities given in the heatmaps.

483

484 **Determination of fraction of dead cells.** The medium (GC + IVX) which was continuously  
485 supplied to the flow chamber, was supplemented with 0.004% PI (propidium iodide) to stain  
486 dead cells during image acquisition. Spheroidal features (dead cells) were detected using the  
487 same method as described in the previous paragraph for detecting living cells. The number of  
488 dead cells,  $\delta$ , was normalized:  $\delta^*(r) = \frac{\delta(r)}{\rho(r)V(r)}$ , where the cell density  $\rho(r)$  is set to be  
489 constant (19). Due to a lower cell density up to  $2 \mu m$  away from the colony edge, the fraction  
490 of dead cells is underestimated there. The volume of interest  $V(r_e)$  is determined as a function  
491 of the distance from the colony edge  $r_e$  within  $[r_e, r_e + 2\mu m]$ . For better comparison between  
492 the heat maps, the fractions of dead cells were averaged within 1.5 h time intervals.

493

## 494 **Acknowledgements**

495 We thank Sebastian Kraus for help with strain construction, and Jens Elgeti, George O'Toole,  
496 and the Maier lab for helpful discussions. This work was supported by the Deutsche  
497 Forschungsgemeinschaft through grants MA3898 and CRC1310, and the Center for Molecular  
498 Medicine Cologne.

499

500 **Competing interests**

501 The authors declare no competing interests.

502

## 503 **References**

- 504 1. Kim W, Racimo F, Schluter J, Levy SB, & Foster KR (2014) Importance of positioning  
505 for microbial evolution. *Proc Natl Acad Sci U S A* 111(16):E1639-1647.
- 506 2. Farrell FDC, Hallatschek O, Marenduzzo D, & Waclaw B (2013) Mechanically Driven  
507 Growth of Quasi-Two-Dimensional Microbial Colonies. *Phys Rev Lett* 111(16).
- 508 3. Tjhung E & Berthier L (2020) Analogies between growing dense active matter and soft  
509 driven glasses. *Phys Rev Res* 2(4).
- 510 4. Zollner R, Oldewurtel ER, Kouzel N, & Maier B (2017) Phase and antigenic variation  
511 govern competition dynamics through positioning in bacterial colonies. *Sci Rep-Uk* 7.
- 512 5. Wang X, Stone HA, & Golestanian R (2017) Shape of the growing front of biofilms.  
513 *New J Phys* 19.
- 514 6. Maier B (2021) How Physical Interactions Shape Bacterial Biofilms. *Annu Rev Biophys.*
- 515 7. Hartmann R, *et al.* (2019) Emergence of three-dimensional order and structure in  
516 growing biofilms. *Nat Phys* 15(3):251-256.
- 517 8. Hall CW & Mah TF (2017) Molecular mechanisms of biofilm-based antibiotic  
518 resistance and tolerance in pathogenic bacteria. *FEMS Microbiol Rev* 41(3):276-301.
- 519 9. Nguyen D, *et al.* (2011) Active starvation responses mediate antibiotic tolerance in  
520 biofilms and nutrient-limited bacteria. *Science* 334(6058):982-986.
- 521 10. Yan J & Bassler BL (2019) Surviving as a Community: Antibiotic Tolerance and  
522 Persistence in Bacterial Biofilms. *Cell Host Microbe* 26(1):15-21.
- 523 11. Balaban NQ, *et al.* (2019) Definitions and guidelines for research on antibiotic  
524 persistence. *Nat Rev Microbiol* 17(7):441-448.
- 525 12. Freyer JP & Sutherland RM (1986) Regulation of growth saturation and development  
526 of necrosis in EMT6/Ro multicellular spheroids by the glucose and oxygen supply.  
527 *Cancer Res* 46(7):3504-3512.
- 528 13. Radszuweit M, Block M, Hengstler JG, Scholl E, & Drasdo D (2009) Comparing the  
529 growth kinetics of cell populations in two and three dimensions. *Phys Rev E* 79(5).
- 530 14. Sternberg C, *et al.* (1999) Distribution of bacterial growth activity in flow-chamber  
531 biofilms. *Appl Environ Microbiol* 65(9):4108-4117.
- 532 15. Teal TK, Lies DP, Wold BJ, & Newman DK (2006) Spatiometabolic stratification of  
533 *Shewanella oneidensis* biofilms. *Appl Environ Microbiol* 72(11):7324-7330.
- 534 16. Stewart PS & Franklin MJ (2008) Physiological heterogeneity in biofilms. *Nat Rev*  
535 *Microbiol* 6(3):199-210.

- 536 17. van Vliet S, *et al.* (2018) Spatially Correlated Gene Expression in Bacterial Groups: The  
537 Role of Lineage History, Spatial Gradients, and Cell-Cell Interactions. *Cell Syst*  
538 6(4):496-507 e496.
- 539 18. Leygeber M, *et al.* (2019) Analyzing Microbial Population Heterogeneity-Expanding  
540 the Toolbox of Microfluidic Single-Cell Cultivations. *J Mol Biol* 431(23):4569-4588.
- 541 19. Drescher K, *et al.* (2016) Architectural transitions in *Vibrio cholerae* biofilms at single-  
542 cell resolution. *P Natl Acad Sci USA* 113(14):E2066-E2072.
- 543 20. Qin B, *et al.* (2020) Cell position fates and collective fountain flow in bacterial biofilms  
544 revealed by light-sheet microscopy. *Science* 369(6499):71-77.
- 545 21. Cronenberg T, Hennes M, Wielert I, & Maier B (2021) Antibiotics modulate attractive  
546 interactions in bacterial colonies affecting survivability under combined treatment.  
547 *PLoS Pathog* 17(2):e1009251.
- 548 22. Hartmann R, *et al.* (2021) Quantitative image analysis of microbial communities with  
549 BiofilmQ. *Nat Microbiol* 6(2):151-156.
- 550 23. Yan J, Sharo AG, Stone HA, Wingreen NS, & Bassler BL (2016) *Vibrio cholerae*  
551 biofilm growth program and architecture revealed by single-cell live imaging. *Proc Natl*  
552 *Acad Sci U S A* 113(36):E5337-5343.
- 553 24. Welker A, *et al.* (2018) Molecular Motors Govern Liquidlike Ordering and Fusion  
554 Dynamics of Bacterial Colonies. *Phys Rev Lett* 121(11):118102.
- 555 25. Saraiva BM, *et al.* (2020) Reassessment of the distinctive geometry of *Staphylococcus*  
556 *aureus* cell division. *Nat Commun* 11(1):4097.
- 557 26. Higashi DL, *et al.* (2007) Dynamics of *Neisseria gonorrhoeae* attachment: microcolony  
558 development, cortical plaque formation, and cytoprotection. *Infect Immun* 75(10):4743-  
559 4753.
- 560 27. Craig L, Forest KT, & Maier B (2019) Type IV pili: dynamics, biophysics and  
561 functional consequences. *Nat Rev Microbiol* 17(7):429-440.
- 562 28. Hornung R, *et al.* (2018) Quantitative modelling of nutrient-limited growth of bacterial  
563 colonies in microfluidic cultivation. *J R Soc Interface* 15(139).
- 564 29. Ponisch W, Weber CA, Juckeland G, Biais N, & Zaboruaev V (2017) Multiscale  
565 modeling of bacterial colonies: how pili mediate the dynamics of single cells and  
566 cellular aggregates. *New J Phys* 19.
- 567 30. Hauryliuk V, Atkinson GC, Murakami KS, Tenson T, & Gerdes K (2015) Recent  
568 functional insights into the role of (p)ppGpp in bacterial physiology. *Nature Reviews*  
569 *Microbiology* 13(5):298-309.
- 570 31. Navarro Llorens JM, Tormo A, & Martinez-Garcia E (2010) Stationary phase in gram-  
571 negative bacteria. *FEMS Microbiol Rev* 34(4):476-495.
- 572 32. Magnusson LU, Farewell A, & Nystrom T (2005) ppGpp: a global regulator in  
573 *Escherichia coli*. *Trends Microbiol* 13(5):236-242.

- 574 33. Fisher SD, Reger AD, Baum A, & Hill SA (2005) RelA alone appears essential for  
575 (p)ppGpp production when *Neisseria gonorrhoeae* encounters nutritional stress. *Fems*  
576 *Microbiol Lett* 248(1):1-8.
- 577 34. Carbonnelle E, Helaine S, Nassif X, & Pelicic V (2006) A systematic genetic analysis  
578 in *Neisseria meningitidis* defines the Pil proteins required for assembly, functionality,  
579 stabilization and export of type IV pili. *Mol Microbiol* 61(6):1510-1522.
- 580 35. Chevin LM (2011) On measuring selection in experimental evolution. *Biol Lett*  
581 7(2):210-213.
- 582 36. Ram Y, *et al.* (2019) Predicting microbial growth in a mixed culture from growth curve  
583 data. *Proc Natl Acad Sci U S A* 116(29):14698-14707.
- 584 37. Oldewurtel ER, Kouzel N, Dewenter L, Henseler K, & Maier B (2015) Differential  
585 interaction forces govern bacterial sorting in early biofilms. *Elife* 4.
- 586 38. Kouzel N, Oldewurtel ER, & Maier B (2015) Gene Transfer Efficiency in Gonococcal  
587 Biofilms: Role of Biofilm Age, Architecture, and Pilin Antigenic Variation. *J Bacteriol*  
588 197(14):2422-2431.
- 589 39. Warren MR, *et al.* (2019) Spatiotemporal establishment of dense bacterial colonies  
590 growing on hard agar. *Elife* 8.
- 591 40. Delarue M, *et al.* (2016) Self-driven jamming in growing microbial populations. *Nature*  
592 *Physics* 12(8):762-766.
- 593 41. Tuson HH, *et al.* (2012) Measuring the stiffness of bacterial cells from growth rates in  
594 hydrogels of tunable elasticity. *Mol Microbiol* 84(5):874-891.
- 595 42. Vidakovic L, Singh PK, Hartmann R, Nadell CD, & Drescher K (2018) Dynamic  
596 biofilm architecture confers individual and collective mechanisms of viral protection.  
597 *Nature Microbiology* 3(1).
- 598 43. Wang LC, Litwin M, Sahiholnasab Z, Song W, & Stein DC (2018) *Neisseria*  
599 *gonorrhoeae* Aggregation Reduces Its Ceftriaxone Susceptibility. *Antibiotics (Basel)*  
600 7(2).
- 601 44. Rotman E & Seifert HS (2014) The Genetics of *Neisseria* Species. *Annu Rev Genet*  
602 48:405-431.
- 603 45. Gao X & Kilfoil ML (2009) Accurate detection and complete tracking of large  
604 populations of features in three dimensions. *Optics Express* 17(6):4685.
- 605 46. Crocker JC & Grier DG (1996) Methods of Digital Video Microscopy for Colloidal  
606 Studies. *J. Colloid Interface Sci.* 179:298.
- 607
- 608
- 609

610 **Supplementary Figures**

611

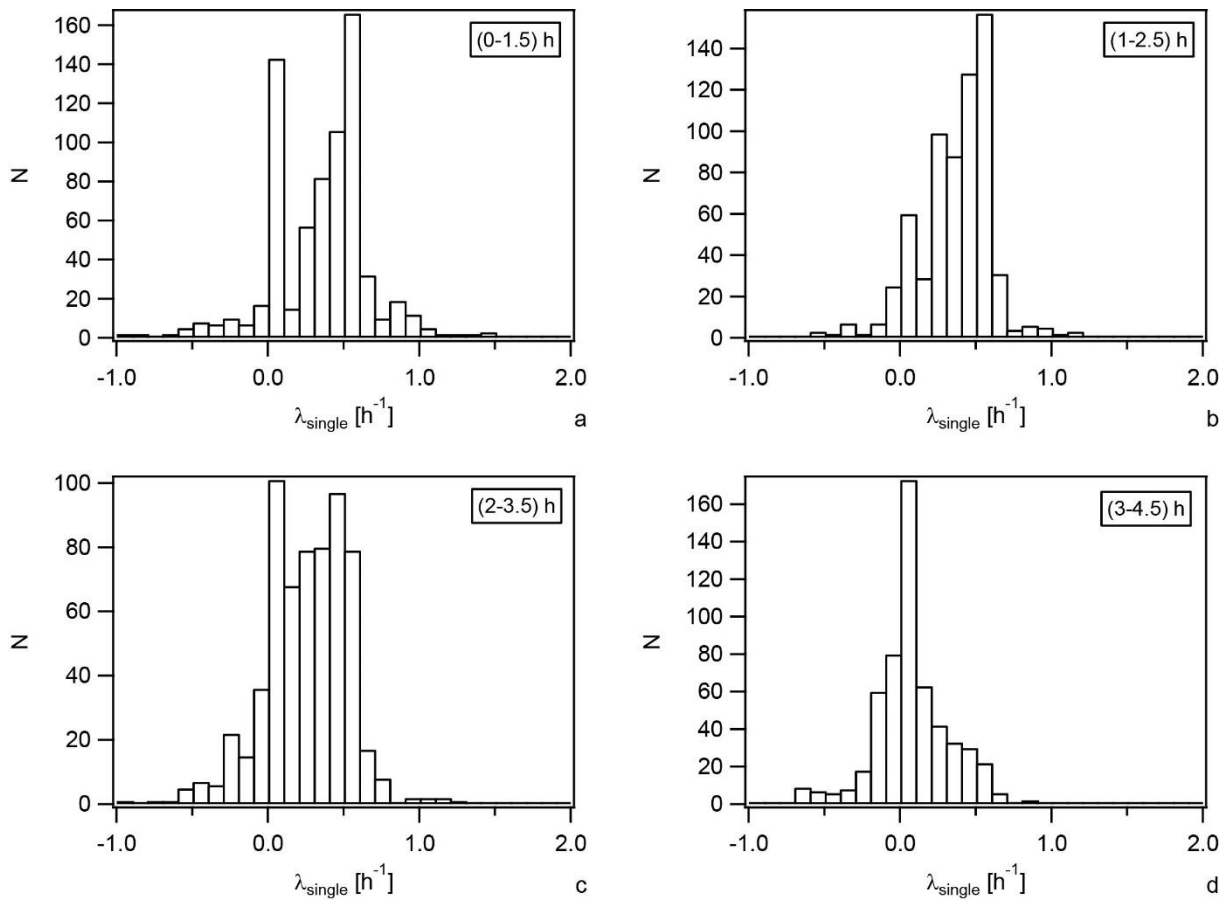

612

613 Fig. S1 Effect of data averaging and fitting on determination of growth rates for *wt\* green*  
614 (Ng194) mixed with *wt\** (Ng150). Histogram of growth rates obtained from single clusters by  
615 fitting over different time intervals of 1.5 h length as described in the Methods section. Please  
616 note that all growth rates shown in the main text have been obtained differently.

617

618



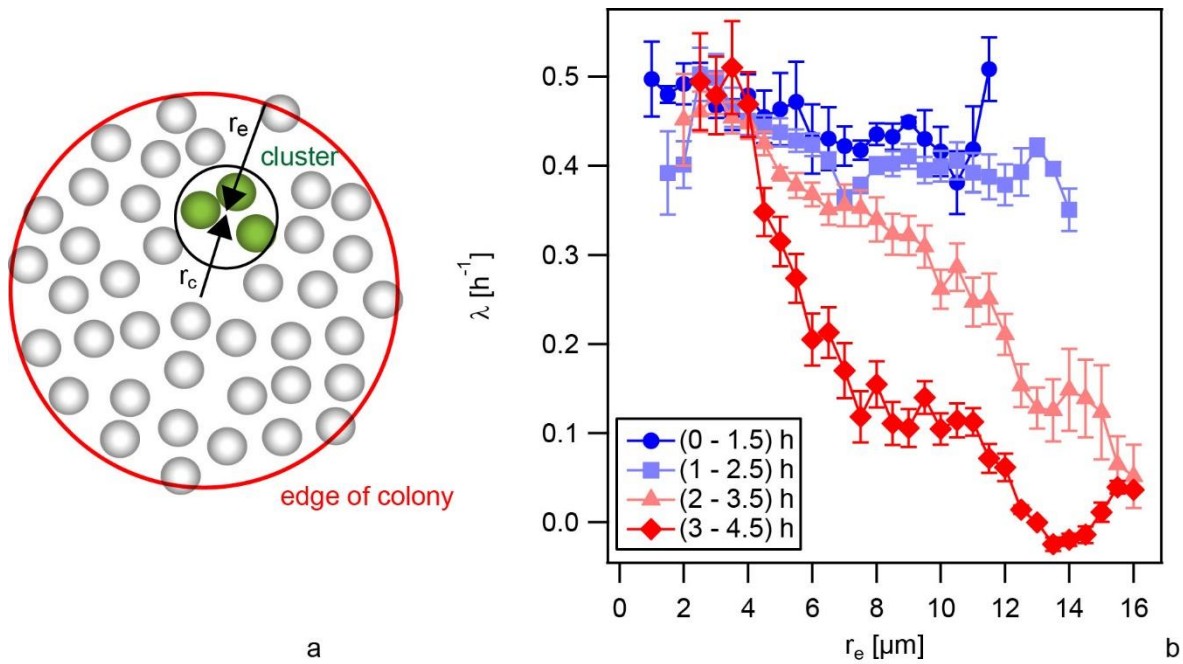

619

a

620 Fig. S2 Growth rate in numbers determined from cell counting within clusters (CC method) of  
621 *wt\* green* (Ng194) mixed with *wt\** (Ng150). a) Sketch of colony with distance to edge,  $r_e$ , and  
622 distance to centre,  $r_c$ . b) Mean growth rate  $\lambda$  as a function of the distance  $r_e$  from the edge of  
623 the colony (mean  $\pm$  se, 10 - 285 clusters for each data point).

624

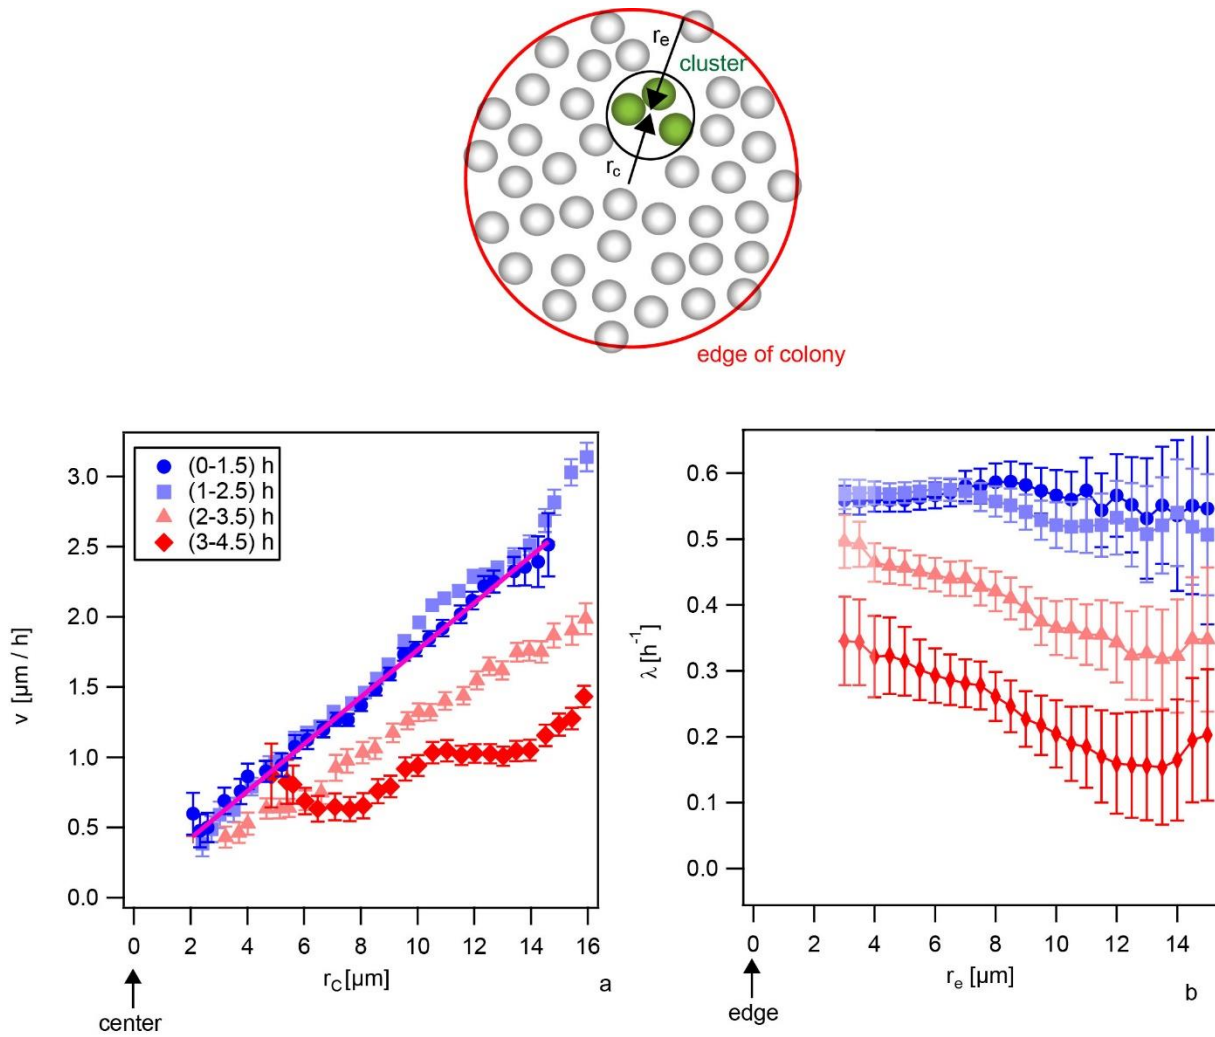

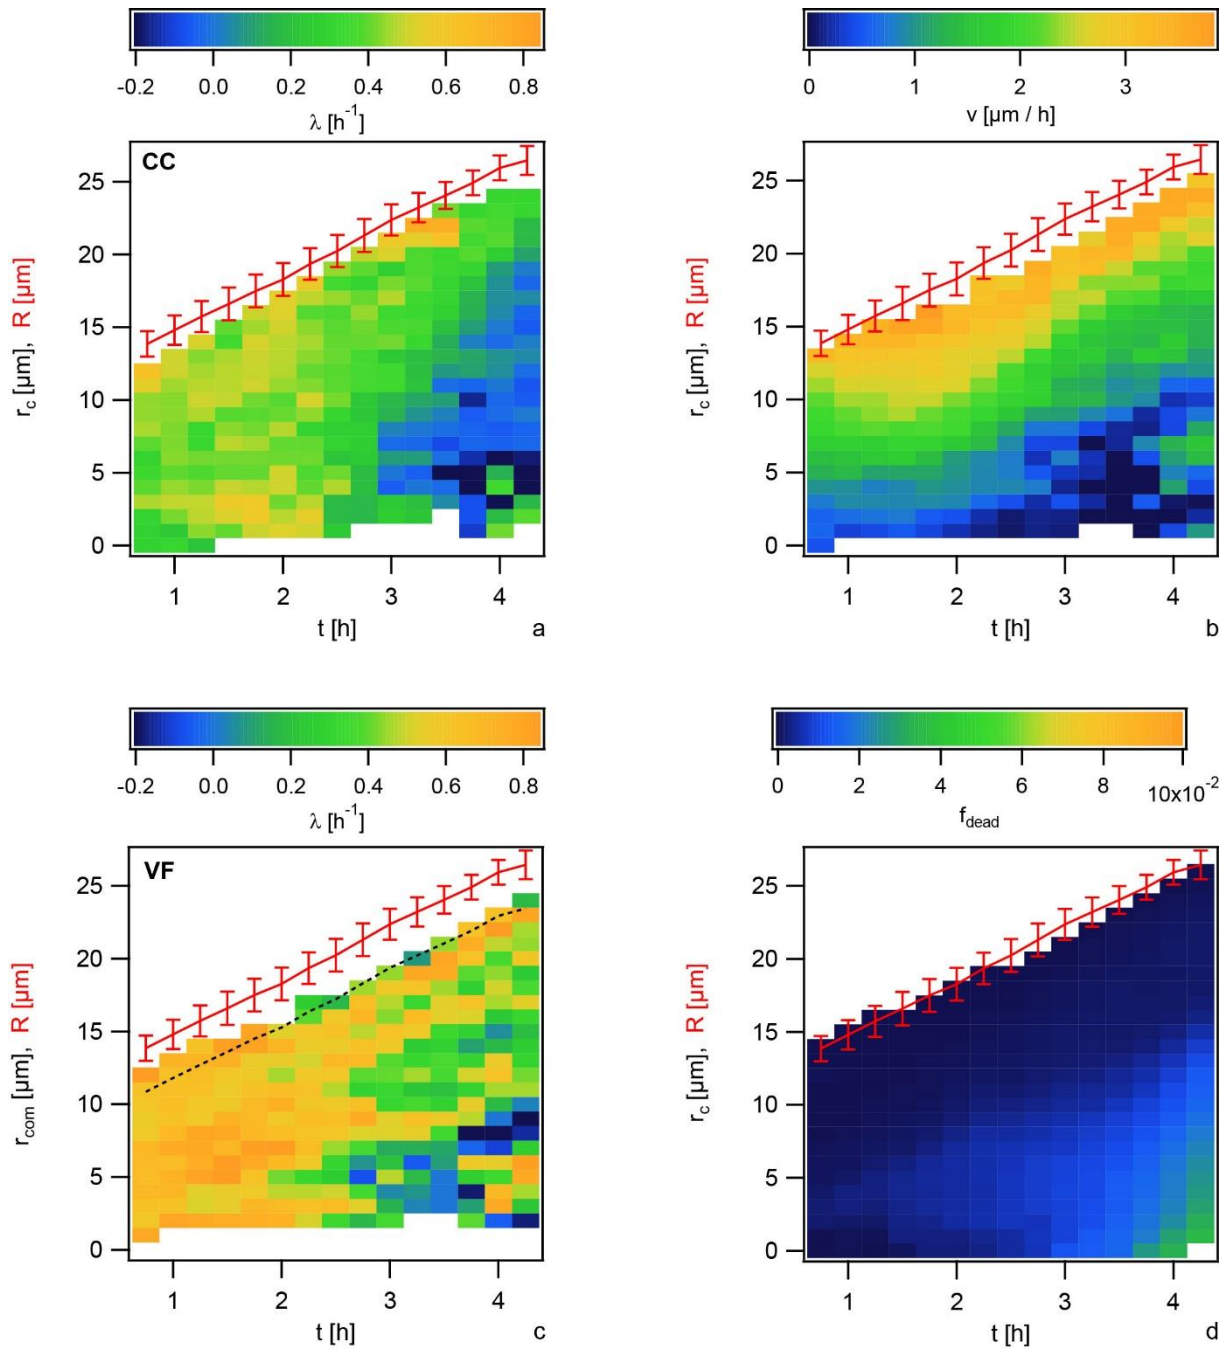

633

634 Fig. S4 Spatio-temporal dynamics of growth of *wt\* green* (Ng194) mixed with *wt\** (Ng150) at  
 635 five-fold higher flow rate as compared to experiments described in Figs 3, 4. a) Growth rate  $\lambda$   
 636 (colour coded) as a function of distance from centre of colony ( $r_c$ ) and time  $t$ . (CC method) b)  
 637 Radial components of cluster velocities  $v$  as a function of of distance from centre of colony ( $r_c$ )  
 638 and time  $t$ . c) Growth rates  $\lambda$  (colour coded) as a function of distance from centre of colony ( $r_c$ )  
 639 and time  $t$ . Black dotted line: denotes area in which reduced cell density introduces a systematic  
 640 error to  $\lambda$ . (VF method) d) Fraction of dead cells  $f_{\text{dead}}$  (colour coded) as a function of distance  
 641 from centre of colony ( $r_c$ ) and time  $t$ . Red lines: Mean colony radius ( $\pm$  standard deviation) as  
 642 a function of time.

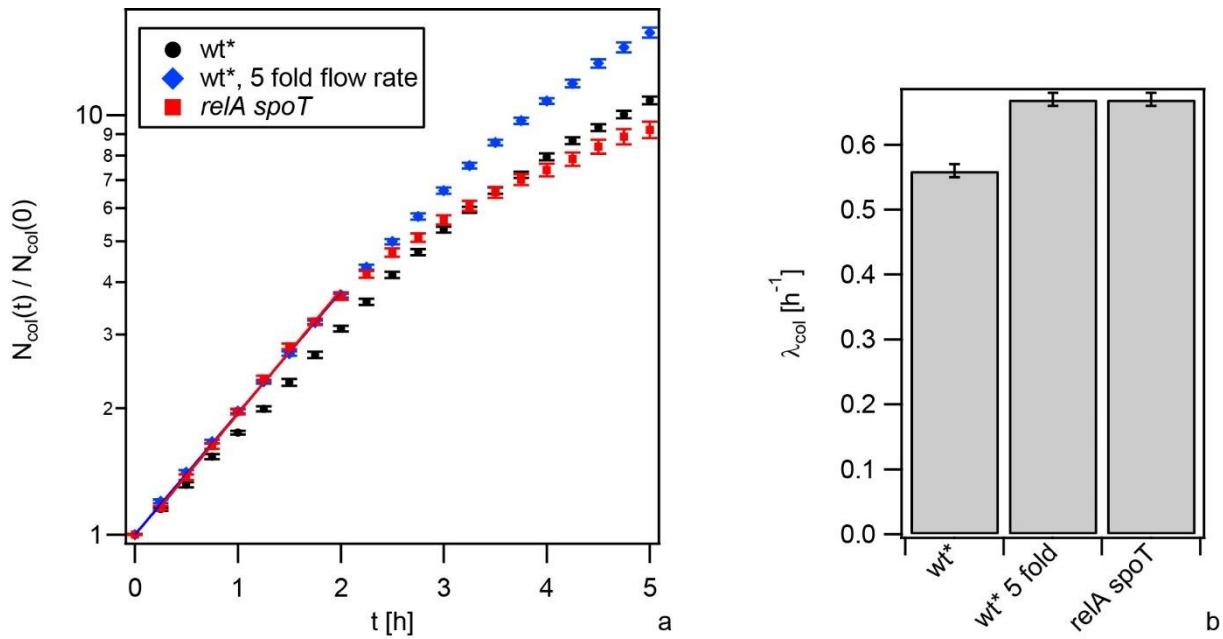

643

644 Fig. S5 Growth rates determined from colony radius in early colonies for  $wt^*$  (Ng150) and  $wt^*$   
645 green (Ng194) at standard flow rate (black),  $wt^*$  (Ng150) and  $wt^*$  green (Ng194) at a five-fold  
646 increased flow rate (blue),  $\Delta relA \Delta spoT$  (Ng198) and  $\Delta relA \Delta spoT$  green (Ng224) at standard  
647 flow rate (red). a) Mean number of cells within colony  $N_{col}(t)$  normalized by the number of cells  
648 in the colony at  $t = 0$ ,  $N_{col}(0)$ . Full lines exponential fit with  $N_{col}(t)/N_{col}(0) = \exp(\lambda_{colony}t)$ .  
649 b) Growth rates  $\lambda_{col}$  determined from fits in (a) (mean  $\pm$  se, > 40 colonies for each data point).

650

651

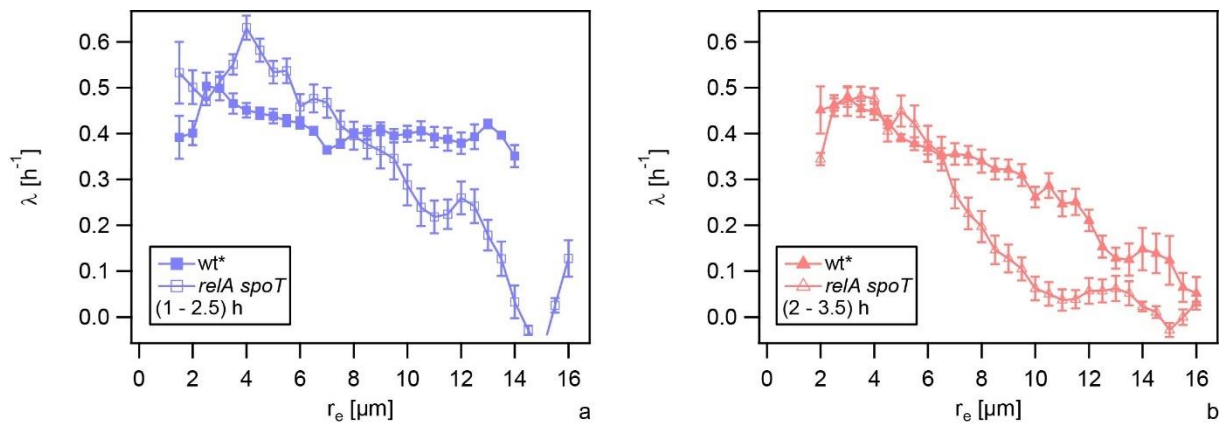

652

653 Fig. S6 Comparison of growth profiles between *wt\** and  $\Delta relA \Delta spoT$  strains. Mean growth  
654 rate  $\lambda$  derived by the CC method as a function of the distance  $r_e$  from the edge of the colony  
655 different time intervals (a, b).  $N > 10$  clusters for each data point.

656

657

658

659 **Supplementary Tables**

660

| <b>Strain</b>                       | <b>Relevant genotype</b>                                                                          | <b>Source/Reference</b> |
|-------------------------------------|---------------------------------------------------------------------------------------------------|-------------------------|
| <i>wt*</i> (Ng150)                  | <i>G4::aac</i>                                                                                    | (4)                     |
| <i>wt* green</i> (Ng194)            | <i>lctp::P<sub>pilE</sub> sfgfp speR::aspC</i><br><i>G4::aac</i>                                  | This study              |
| <i>ΔrelA ΔspoT</i> (Ng198)          | <i>relA::nptII spoT::ermC</i><br><i>G4::aac</i>                                                   | This study              |
| <i>ΔrelA ΔspoT green</i><br>(Ng224) | <i>relA::nptII spoT::ermC</i><br><i>lctp::P<sub>pilE</sub> sfgfp speR::aspC</i><br><i>G4::aac</i> | This study              |

661

662 Table S1 Bacterial strains used in this study.

663

664

665
